# Supplementary material
Source: PubMed Central journal article supplement (PMC7430975)
Supplement: pnas.2011228117.sapp.pdf [file pnas.2011228117.sapp.pdf]

|                          | <b>ER<math>\alpha</math></b> |                | <b>GPER1</b>   |                | <b>ER<math>\beta</math></b> |                |
|--------------------------|------------------------------|----------------|----------------|----------------|-----------------------------|----------------|
|                          | Females                      | Males          | Females        | Males          | Females                     | Males          |
| <b>Total VMH</b>         | 71.9 $\pm$ 9.7               | 93.9 $\pm$ 1.7 | 95.9 $\pm$ 1.1 | 98.8 $\pm$ 0.7 | 92.2 $\pm$ 1.9              | 96.8 $\pm$ 1.3 |
| <b>Dorsomedial VMH</b>   | 72.6 $\pm$ 9.8               | 93.0 $\pm$ 2.4 | 97.5 $\pm$ 0.7 | 98.5 $\pm$ 0.9 | 92.0 $\pm$ 2.6              | 96.6 $\pm$ 1.5 |
| <b>Ventrolateral VMH</b> | 71.0 $\pm$ 9.7               | 95.3 $\pm$ 2.4 | 93.7 $\pm$ 1.7 | 99.3 $\pm$ 0.4 | 91.0 $\pm$ 3.1              | 98.0 $\pm$ 1.0 |

### Supplementary Table 1

Percentage of SF1<sup>+</sup> neurons containing mGluR5 and ER $\alpha$ , GPER1 or ER $\beta$  in the VMH of wild type females and males (n = 3)

|                          | % ER $\alpha$ <sup>+</sup> /SF1 <sup>+</sup> |                | % SF1 <sup>+</sup> /ER $\alpha$ <sup>+</sup> |                |
|--------------------------|----------------------------------------------|----------------|----------------------------------------------|----------------|
|                          | Females                                      | Males          | Females                                      | Males          |
| <b>Total VMH</b>         | 81.0 $\pm$ 1.1                               | 85.8 $\pm$ 3.2 | 70.2 $\pm$ 9.6                               | 92.1 $\pm$ 2.2 |
| <b>Dorsomedial VMH</b>   | 94.5 $\pm$ 0.5                               | 97.1 $\pm$ 1.2 | 70.8 $\pm$ 9.5                               | 90.5 $\pm$ 2.9 |
| <b>Ventrolateral VMH</b> | 65.8 $\pm$ 2.2                               | 73.2 $\pm$ 5.2 | 69.4 $\pm$ 9.9                               | 94.4 $\pm$ 2.4 |

### Supplementary Table 2

Percentage of ER $\alpha$ <sup>+</sup> neurons containing SF1 (left) and percentage of SF1<sup>+</sup> neurons containing ER $\alpha$  in the VMH of wild type females and males (n = 3)

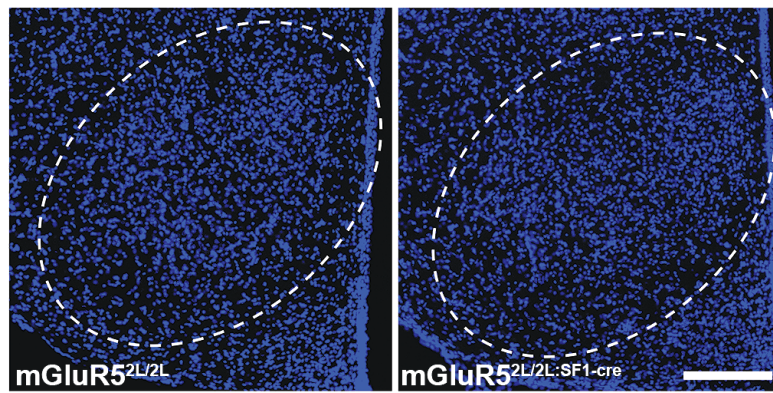

### Supplementary Figure 1

Gross VMH cytoarchitecture is preserved in the absence of mGluR5 in SF1 neurons

Representative brain sections obtained from mGluR5<sup>2L/2L</sup> control and mGluR5<sup>2L/2L</sup>:SF1-cre mutant females containing VMH (dashed lines) and stained with DAPI. Scale bar: 250  $\mu$ M

**a**

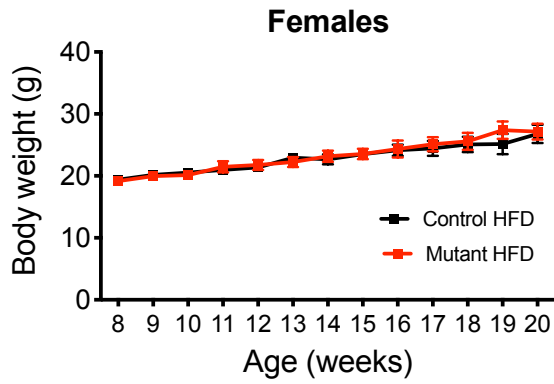

**b**

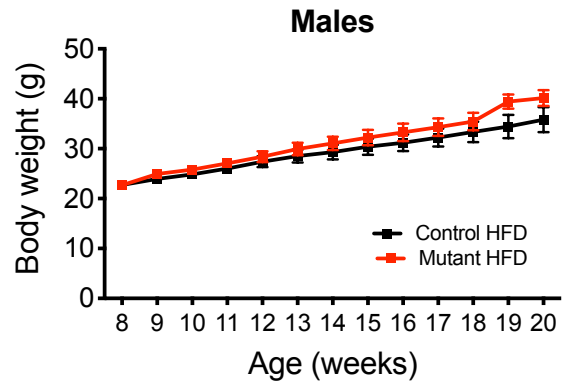

### Supplementary Figure 2

Normal body weights in female and male  $mGluR5^{2L/2L:SF1-cre}$  mice challenged with a high fat diet

a. Body weights of  $mGluR5^{2L/2L}$  and  $mGluR5^{2L/2L:SF1-cre}$  females (n = 6) fed a high fat diet starting at 8 weeks of age.

b. Body weights of  $mGluR5^{2L/2L}$  (n = 7) and  $mGluR5^{2L/2L:SF1-cre}$  (n = 9) males fed a high fat diet starting at 8 weeks of age.

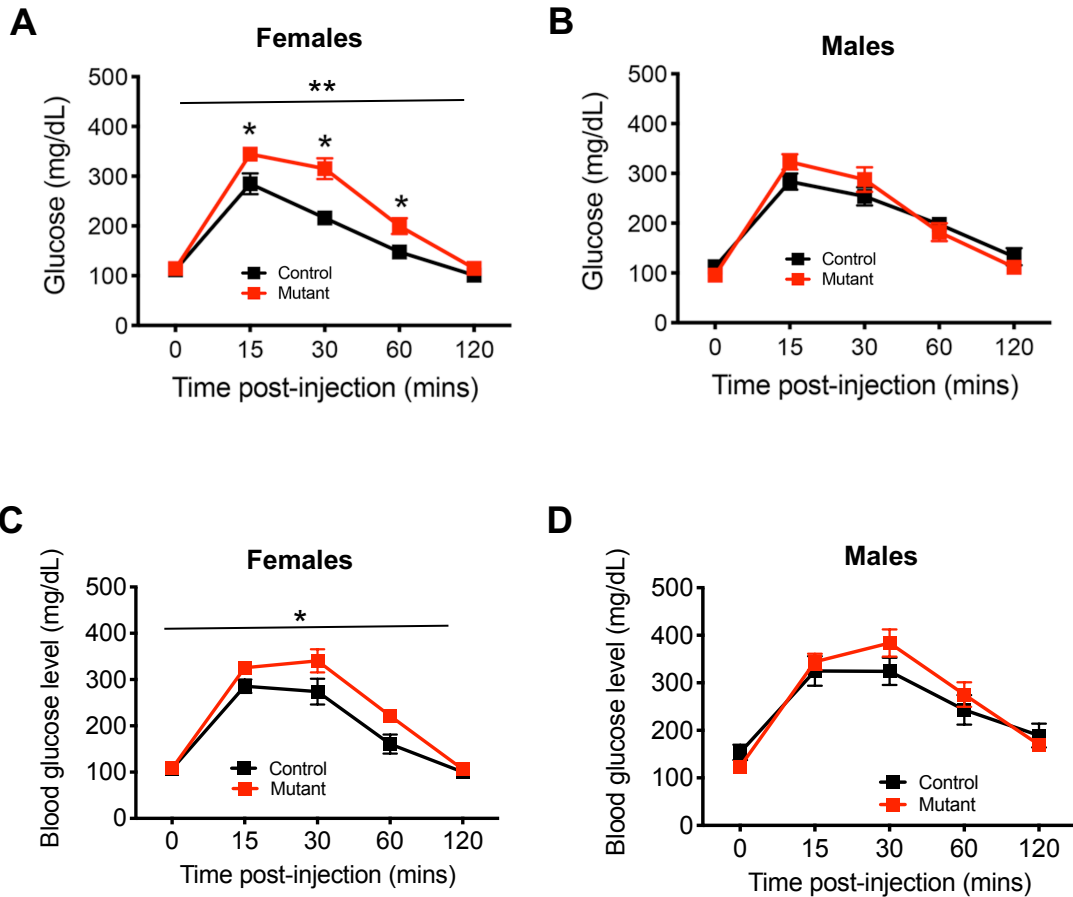

### Supplementary Figure 3

Abnormal responses of female but not male  $mGluR5^{2L/2L}:SF1-cre$  in the glucose tolerance test

A. Glucose tolerance test (GTT) in  $mGluR5^{2L/2L}:SF1-cre$  mutant ( $n = 11$ ) and  $mGluR5^{2L/2L}$  control ( $n = 10$ ) females fed a chow diet at 8 weeks of age. \*\*, Two-way ANOVA: Genotype,  $p = 0.002$ ; Time,  $p < 0.0001$ ; Interaction of time and genotype,  $p = 0.002$ . Bonferroni's multiple comparisons test: \*,  $p < 0.05$ .

B. Glucose tolerance test in  $mGluR5^{2L/2L}:SF1-cre$  ( $n = 13$ ) and  $mGluR5^{2L/2L}$  ( $n = 11$ ) males fed a chow diet at 8 weeks of age. Two-way ANOVA: Genotype, NS. Time,  $p < 0.0001$

C. Glucose tolerance test in  $mGluR5^{2L/2L}:SF1-cre$  ( $n = 8$ ) and  $mGluR5^{2L/2L}$  ( $n = 7$ ) females, 20 weeks of age fed a high fat diet starting at 8 weeks of age. \*, Two-way ANOVA: Genotype,  $p = 0.05$ ; Time,  $p < 0.0001$ ; Interaction of genotype and time,  $p = 0.02$ .

D. Glucose tolerance test in  $mGluR5^{2L/2L}:SF1-cre$  ( $n = 8$ ) and  $mGluR5^{2L/2L}$  ( $n = 8$ ) males 20 weeks of age fed a high fat diet starting at 8 weeks of age. Two-way ANOVA: Genotype, NS. Time,  $p < 0.0001$

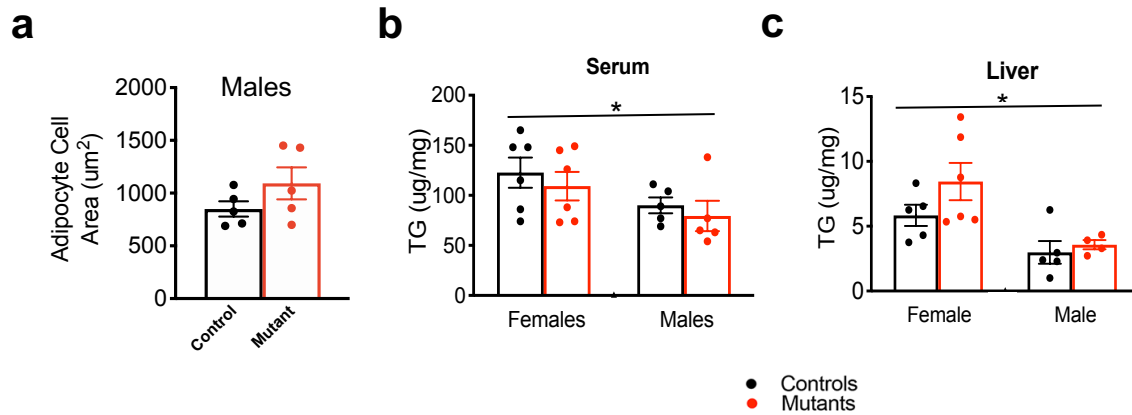

#### Supplementary Figure 4

Adipocyte size and levels of triglycerides in serum and liver of  $\text{mGluR5}^{2L/2L:\text{SF1-cre}}$  and  $\text{mGluR5}^{2L/2L}$  mice.

a. Adipocyte cell area in  $\text{mGluR5}^{2L/2L:\text{SF1-cre}}$  and  $\text{mGluR5}^{2L/2L}$  ( $n = 5$ ) males. Two tailed unpaired t-test: NS

b. Triglyceride (TG) levels in serum of  $\text{mGluR5}^{2L/2L}$  and  $\text{mGluR5}^{2L/2L:\text{SF1-cre}}$  (females,  $n = 6$  and males,  $n = 5$ ). \*, Two-way ANOVA: Genotype, NS. Sex,  $p = 0.04$ .

c. Triglyceride (TG) levels in liver of  $\text{mGluR5}^{2L/2L}$  and  $\text{mGluR5}^{2L/2L:\text{SF1-cre}}$  (females,  $n = 6$  and males,  $n = 4-5$ ). \*, Two-way ANOVA: Genotype, NS. Sex,  $p = 0.003$ .

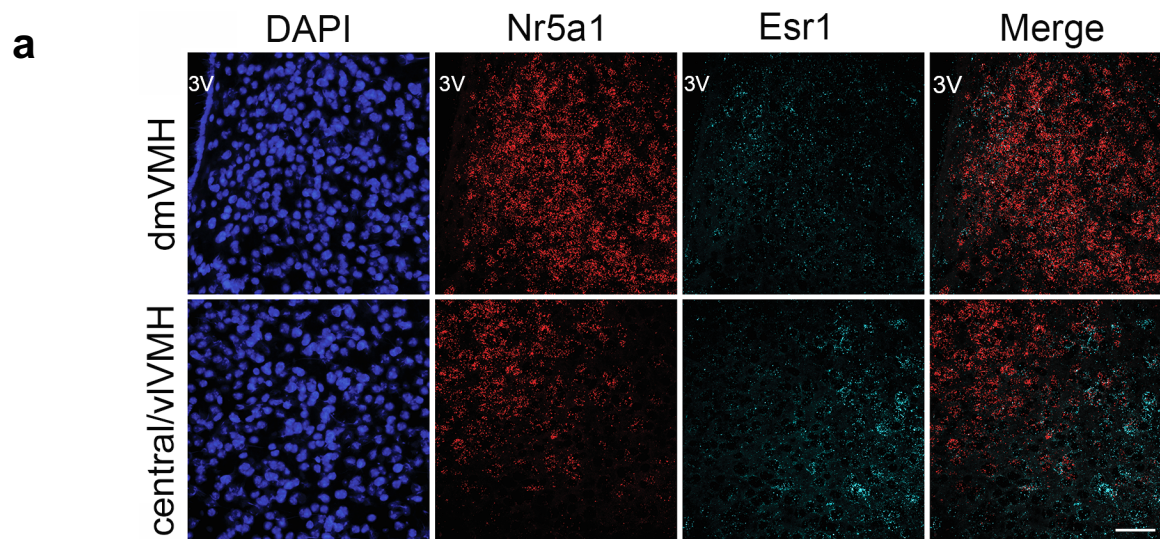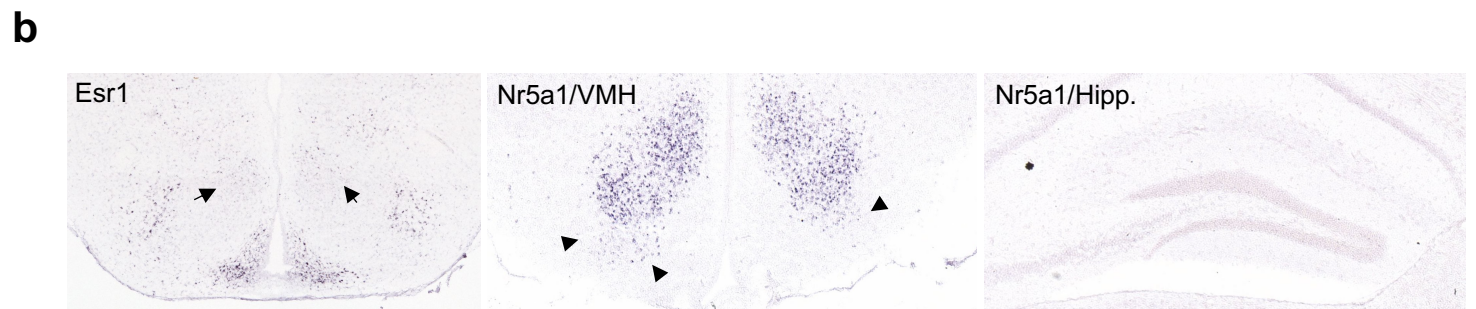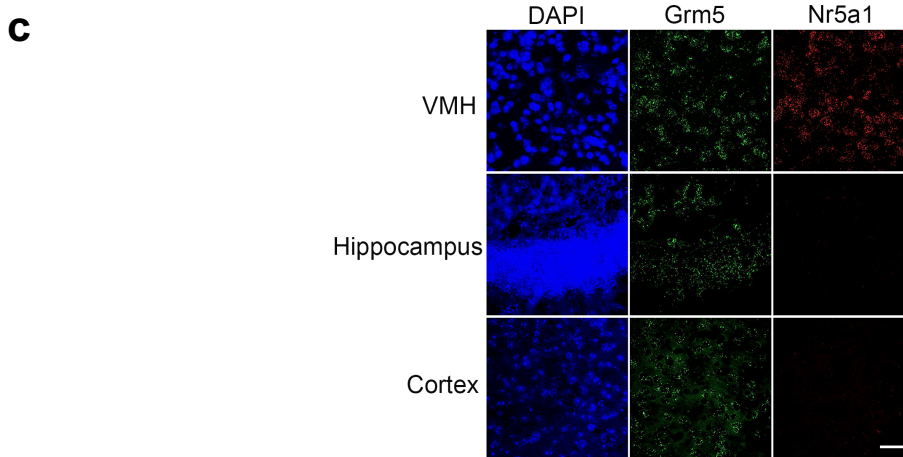

### Supplementary Figure 5

ER $\alpha$  and SF1 mRNA expression in the adult VMH

a. Representative brain sections from adult female mice containing dorsomedial (dmVMH), central and ventrolateral (vVMH) showing detection of SF1 (Nr5a1) and ER $\alpha$  (Esr1) transcripts using RNAscope. 3V, third ventricle. Scale bar = 50 $\mu$ M.

b. Examination of ER $\alpha$  (Experiment 79591677) and SF1 (Experiment 734) mRNA expression from the Allen Brain Institute. Black arrows: ER $\alpha$  mRNA in dmVMH; Black arrowheads: SF1 mRNA in vVMH

c. RNAscope detection of mGluR5 (Grm5) and SF1 (Nr5a1) transcripts dmVMH, hippocampus and cortex. Scale bar = 50  $\mu$ m

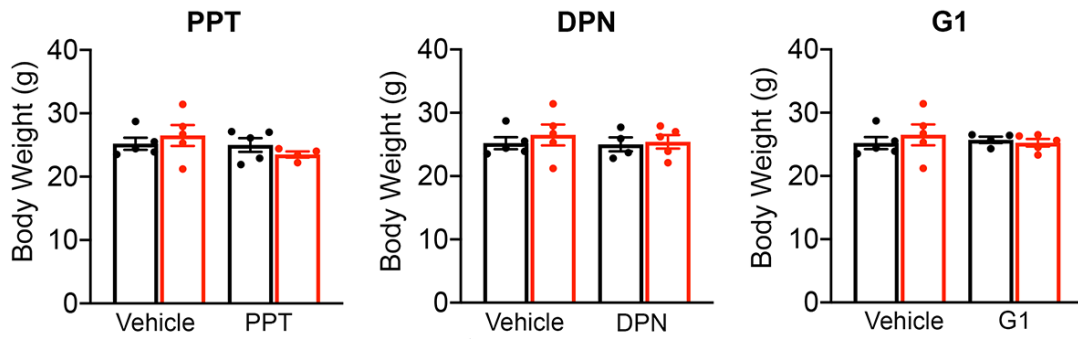

### Supplementary Figure 6

Body weights of mGluR5<sup>2L/2L</sup> (black) and mGluR5<sup>2L/2L:SF1-cre</sup> (red) females treated with estrogen receptor selective agonists PPT, DPN and G1.



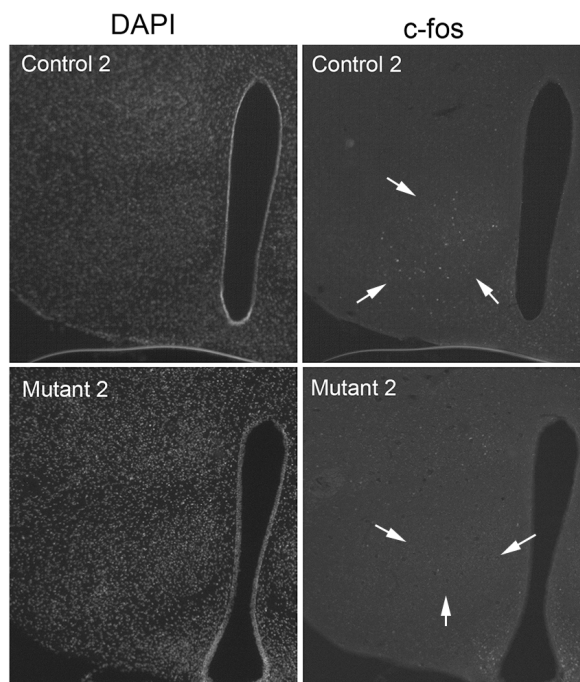

### Supplementary Figure 7

Diminished VMH neuronal activity following depletion of mGluR5 in SF1 neurons

c-fos<sup>+</sup> cells in VMH (arrows) of fasted (16 hours) in a second set of mGluR5<sup>2L/2L</sup>:SF1-cre and mGluR5<sup>2L/2L</sup>:SF1-cre females 30 minutes following injection of a bolus of glucose.

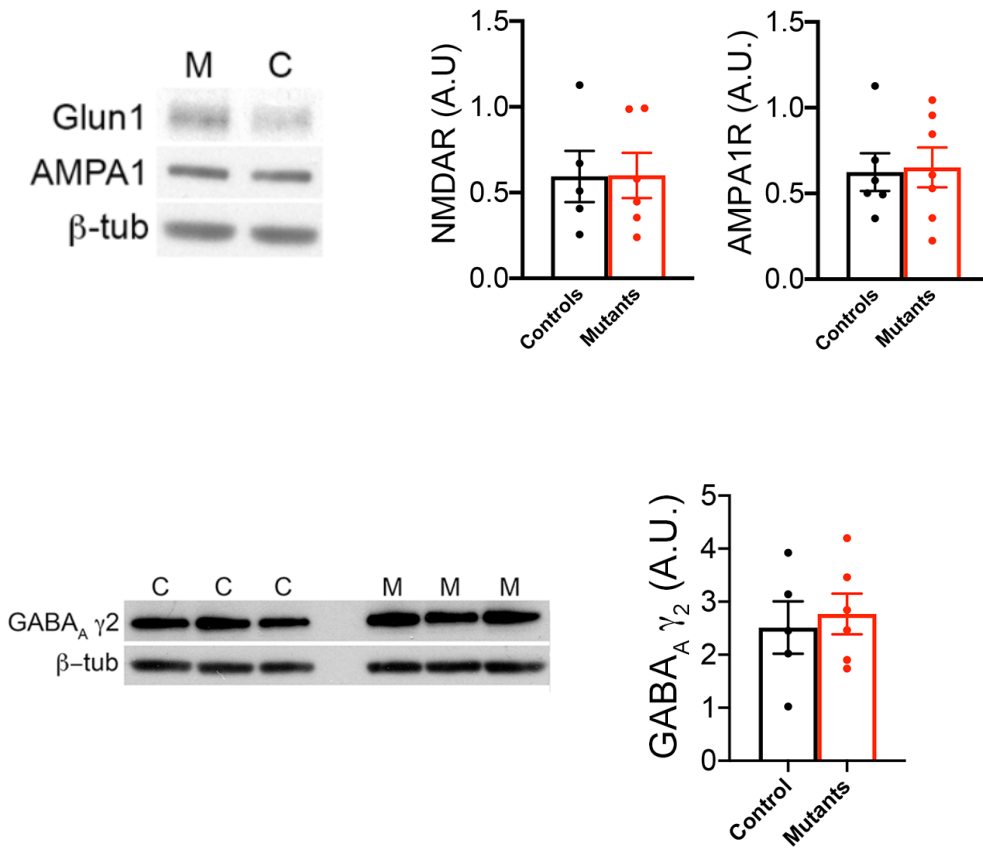

### Supplementary Figure 8

Normal expression of NMDA, AMPA1 and GABA<sub>A</sub> receptors in the VMH of mGluR5<sup>2L/2L:SF1-cre</sup> mutant females.

a. Glun1 and AMPA1 protein expression in the VMH of mGluR5<sup>2L/2L</sup> control (C) (n = 5) and mGluR5<sup>2L/2L:SF1-cre</sup> mutant (M) (n = 6) females. Two-tailed unpaired t-test: NS. Data presented as means ± SEM

b. Western blot analysis and quantification of total levels of GABA<sub>A</sub> γ<sub>2</sub> protein in the VMH of mGluR5<sup>2L/2L</sup> control (C) (n = 5) and mGluR5<sup>2L/2L:SF1-cre</sup> mutant (M) (n = 6) females. Two-tailed unpaired t-test: NS. Data presented as means ± SEM
